# Supplementary material for: Microengineering Design for Advanced W-Based Bulk Materials with Improved Properties
Source: MDPI journal article supplement (doi:10.3390/nano13061012), 2023-03-11
Supplement: s1 [file s1]

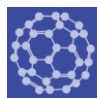

Supplementary Materials

# Microengineering Design for Advanced W-Based Bulk Materials with Improved Properties

Magdalena Galatanu <sup>1</sup>, Monica Enculescu <sup>1</sup>, Andrei Galatanu <sup>1,\*</sup>, Dorina Ticos <sup>2</sup>, Marius Dumitru <sup>2</sup> and Catalin Ticos <sup>2</sup><sup>1</sup> National Institute of Materials Physics, Atomistilor Street 405 A, Magurele, 077125 Ilfov, Romania<sup>2</sup> National Institute for Laser, Plasma and Radiation Physics, Atomistilor Street 409, Magurele

\* Correspondence: gala@infim.ro

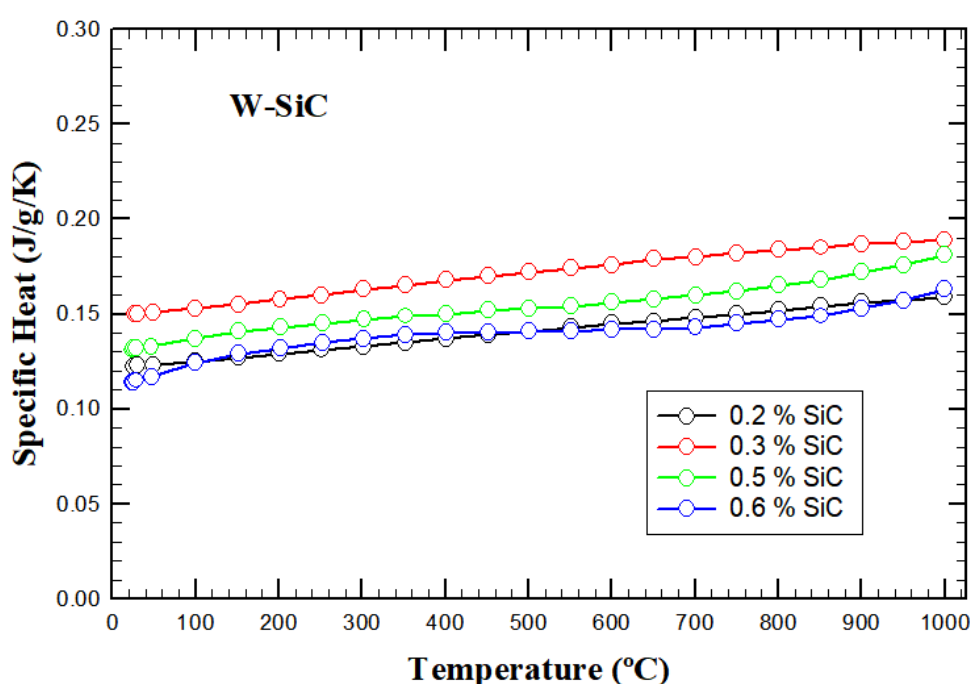

Figure S1. Specific heat of the W-SiC composites.

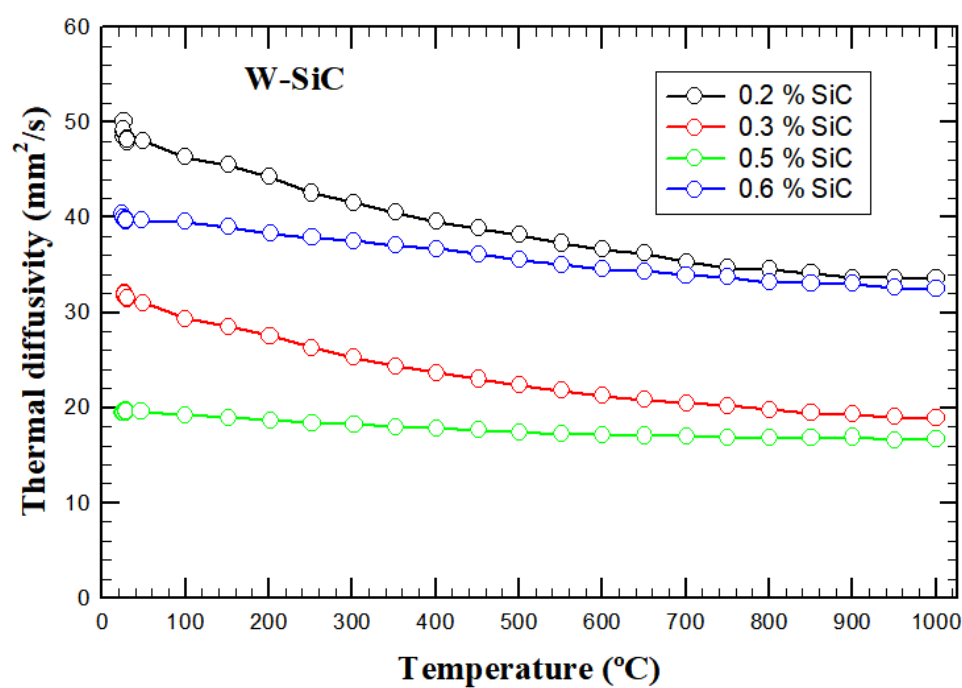

Figure S2. Thermal diffusivity for W-SiC composites.

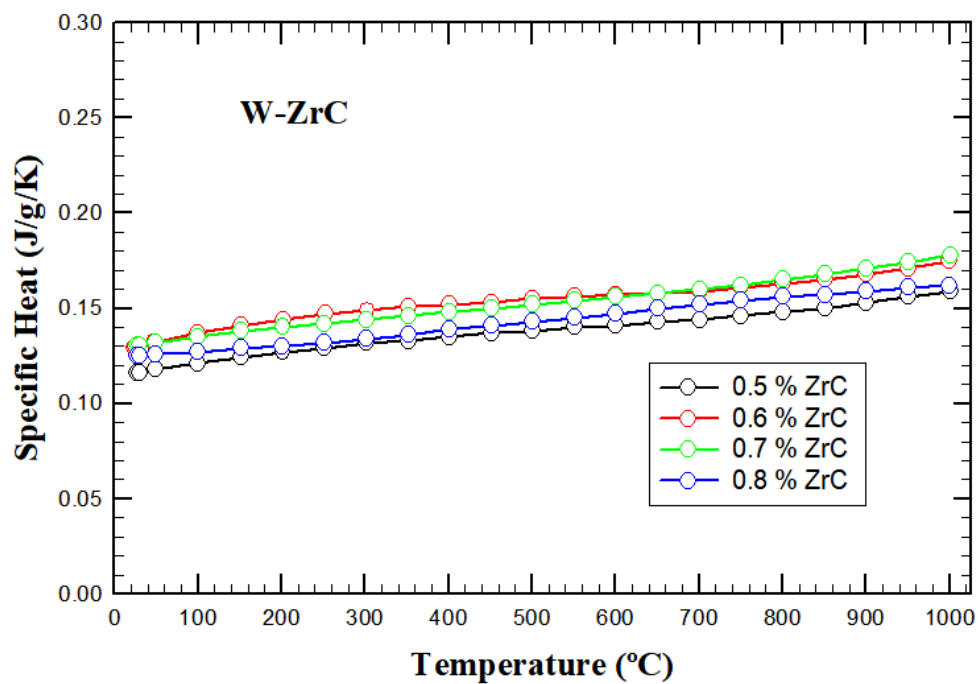

Figure S3. Specific heat of the W-ZrC composites.

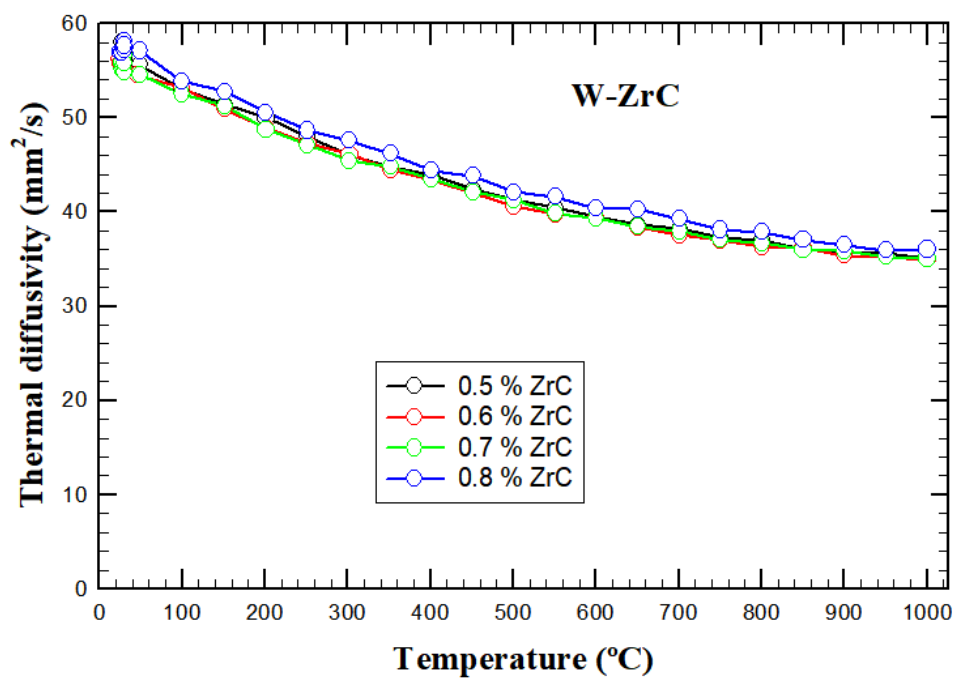

Figure S4. Thermal diffusivity for W-ZrC composites.
